

# Peer Community In Paleontology

[paleo.peercommunityin.org](http://paleo.peercommunityin.org)

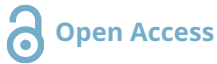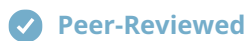

## RESEARCH ARTICLE

# The impact of allometry on vomer shape and its implications for the taxonomy and cranial kinesis of crown-group birds

Olivia Plateau<sup>1</sup>  & Christian Foth<sup>1</sup> 

<sup>1</sup> Department of Geosciences, University of Fribourg – Fribourg, Switzerland

**Cite as:** Plateau O and Foth C (2021). The impact of allometry on vomer shape and its implications for the taxonomy and cranial kinesis of crown-group birds. *bioRxiv* 184101, ver. 3 peer-reviewed by PCI Paleo. DOI: 10.1101/2020.07.02.184101

**Published:** 14 April 2021

### Recommender:

Andrew Farke

### Reviewers:

Sergio Martínez Nebreda and Roland Sookias

### Correspondence:

[olivia.plateau@unifr.ch](mailto:olivia.plateau@unifr.ch)

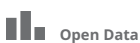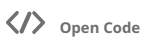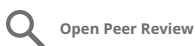

© 2021 Author(s)

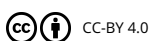

This work is licensed under the Creative Commons Attribution 4.0 International License.

THIS ARTICLE WAS PEER-REVIEWED BY PCI PALEO

Read the Editor's recommendation and Referees' reports at [DOI:10.24072/pci.paleo.100007](https://doi.org/10.24072/pci.paleo.100007)

### Abstract

Crown birds are subdivided into two main groups, Palaeognathae and Neognathae, that can be distinguished, among other means, by the organization of the bones in their pterygoidpalatine complex (PPC). Shape variation of the vomer, which is the most anterior part of the PPC, was recently analysed with help of geometric morphometrics to discover morphological differences between palaeognath and neognath birds. Based on this study, the vomer was identified as sufficient to distinguish the two main groups (and even some inclusive neognath groups) and their cranial kinetic system. As there are notable size differences between the skulls of Palaeognathae and Neognathae, we here investigate the impact of allometry on vomeral shape and its implication for taxonomic classification by re-analysing the data of the previous study. Different types of multivariate statistical analyses reveal that taxonomic identification based on vomeral shape is strongly impaired by allometry, as the error of correct identification is high when shape data is corrected for size. This finding is evidenced by a great overlap between palaeognath and neognath subclades in morphospace. Correct taxonomic identification is further impeded by the convergent presence of a flattened vomeral morphotype in multiple neognath subclades. As the evolution of cranial kinesis has been linked to vomeral shape in the original study, the correlation between shape and size of the vomer across different bird groups found in the present study questions this conclusion. In fact, cranial kinesis in crown birds results from the loss of the jugal-postorbital bar in the temporal region and ectopterygoid in the PPC and the combination of a mobilized quadratezygomatic arch complex and a flexible PPC. Therefore, we can conclude that vomer shape itself is not a suitable proxy for exploring the evolution of cranial kinesis in crown birds and their ancestors. In contrast, the evolution of cranial kinesis needs to be viewed in context of the braincase, quadrate-zygomatic arch and the whole pterygoid-palatine complex.

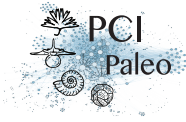

## Introduction

The pterygoid-palatine complex (PPC) of crown birds is mainly formed by five bones: the unpaired vomer that results from the fusion of the originally paired vomer elements, and the paired pterygoids and palatines. The general morphology of the PPC was first studied by [Huxley \(1867\)](#), who distinguished the clade Palaeognathae from all other birds on the basis of palatal morphology. Although the PPC of Palaeognathae is quite variable ([McDowell, 1948](#)), it is characterized by a large vomer that is only partly fused. The pterygoids and palatines are highly connected, forming a rigid unit that articulates with the braincase via well-developed basiptyergoid processes, while a contact with the parasphenoid is not present (see [Bellairs and Jenkin, 1960](#); [Zusi, 1993](#); [Gussekkloo et al., 2001](#); [Mayr, 2017](#); [Fig. 1A](#)). In contrast, neognath birds possess a movable joint between pterygoid and palatine, which plays an important role in the kinematic movement of the upper jaw. Here, the pterygoid articulates with the parasphenoid, while the basiptyergoid processes are often reduced. The vomer is highly variable in size and shape and often has no connection with the upper jaw beyond an association with the nasal septum and the palatine. In some neognaths, the vomer is greatly reduced or even absent (see [Bellairs and Jenkin, 1960](#); [Bock, 1964](#); [Zusi, 1993](#); [Mayr, 2017](#); [Fig. 1A](#)).

In a recent paper, [Hu et al. \(2019\)](#) investigated palate evolution in crown birds and their stem, focusing on the morphology of the vomer. Using 3D geometric morphometrics, the study found that the vomeral shape of neognaths is clearly distinguishable from Palaeognathae, in that the latter group has a stronger similarity with their non-avian ancestors. Linking vomer shape with the kinetic abilities of the skull, the authors concluded that cranial kinesis represents an innovation of Neognathae. Furthermore, the authors concluded that vomeral morphology allows for a taxonomic differentiation between the major groups of Neognathae, namely Aequorlitorornithes, Galloanserae, Gruiformes, and Inopinaves. However, according to their *PCA* results, all groups strongly overlap each other within PC1, while a taxonomic differentiation is only noticeable within PC2 (other principal components are not shown). Taking the great size variation of the vomer of neognath birds into account ([Zusi, 1993](#)), we wonder if the reported taxonomic differentiation between palaeognaths and the neognath subclades could alternatively be related to allometry, i.e. the dependence of shape on size ([Klingenberg, 1998](#)), rather than pure shape variation. In order to test this hypothesis, we re-analysed the dataset of [Hu et al. \(2019\)](#), comparing allometric shape data with non-allometric residuals, and re-evaluating the role of the vomer in the evolution of cranial kinesis in crown birds.

## Material and methods

The published 3D models and landmarks data of 41 specimens including 36 species were downloaded from [Hu et al. \(2019\)](#) (10.6084/m9.figshare.7769279.v2). This dataset contains five extinct species (two stem line representatives: the troodontid *Sinovenator changii*, the Avialae *Sapeornis chaoyangensis*; and three fossil palaeognath crown birds from the clade Dinornithiformes: *Pachyornis australis*, *Megalapteryx didinus* and *Diornis robustus*), five extant Palaeognathae and 27 extant Neognathae representing the two major clades of crown birds.

The original data (Dataset A) is composed of five anatomical landmarks and 43 semi-landmarks (see [Hu et al., 2019](#)). The landmark data were imported into the software R v.3.5.2 ([R Core Team, 2011](#)). Using the *plotAllSpecimens* function of *Geomorph* v.3.2.1 ([Adams and Otárola-Castillo, 2013](#)) in R, we notice great variability for each anatomical landmark, resulting from two main shapes of the vomer. The majority of bird possesses a fused vomer that is bilaterally symmetric and roof-shaped in transection, with a horizontal orientation within the pterygoid-palatine complex ([Fig. 1B](#)). In contrast, some members of Aequorlitorornithes (e.g., *Podiceps nigricollis*, and *Podilymbus podiceps*), Galloanserae (e.g., *Anas crecca*,

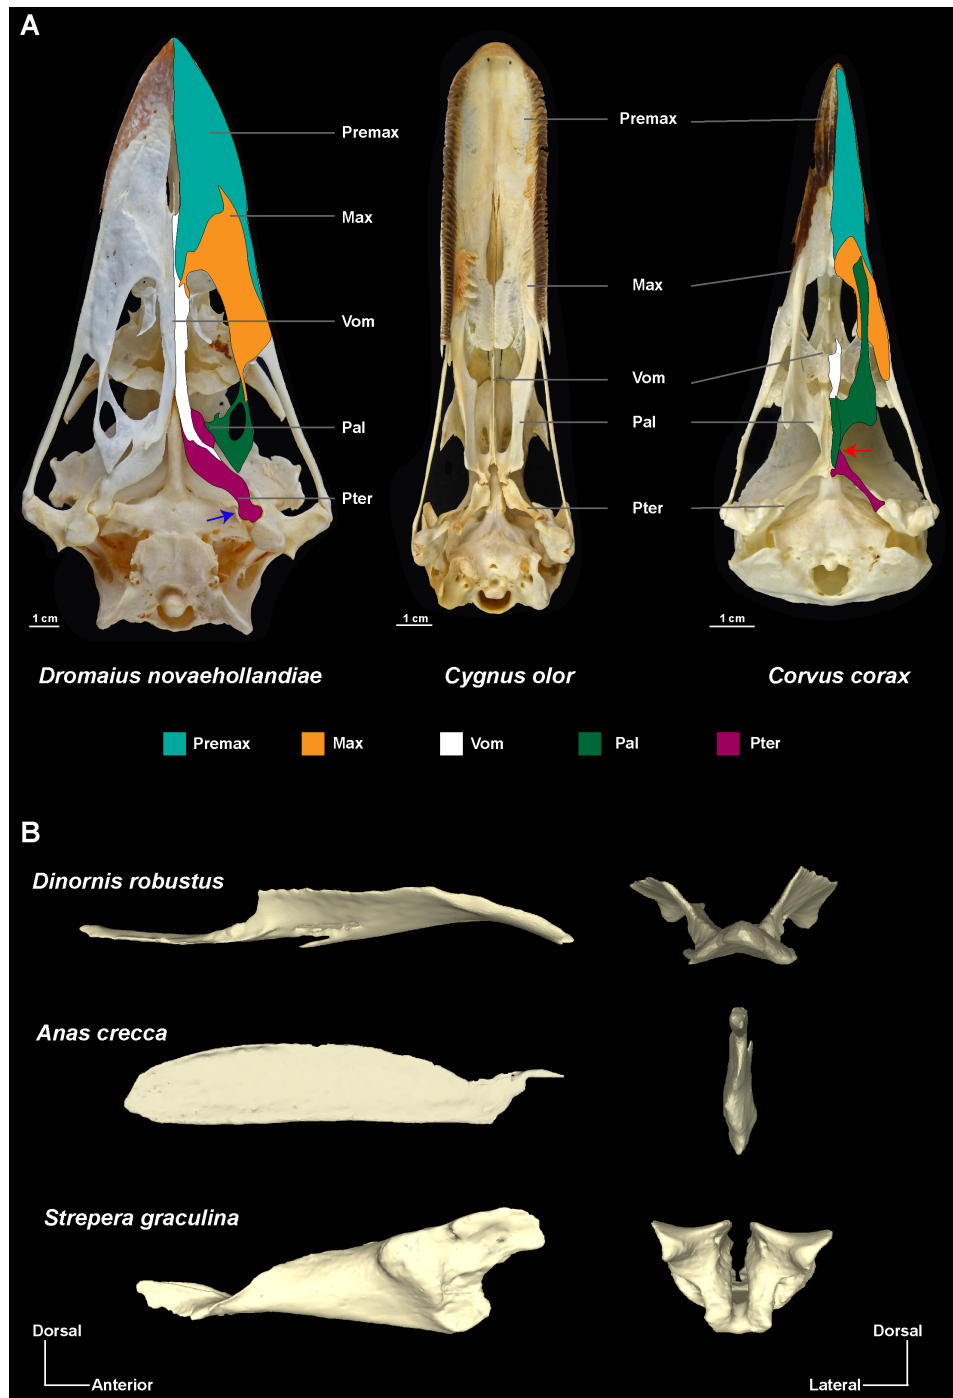

**Figure 1. Anatomical organization of the pterygoid-palatine complex (PPC) and shape variability of the vomer in palaeognath and neognath birds.** (A) Palates of *Dromaius novaehollandiae* (left), *Cygnus olor* (middle) and *Corvus corax* (right) in ventral view (all specimens from the Natural History Museum of Fribourg/University of Fribourg). For *Dromaius novaehollandiae* and *Corvus corax* the main organization of palate morphology is highlighted in a coloured scheme. The blue arrow in *Dromaius novaehollandiae* indicates the contact between the basipterygoid process and the pterygoid. The red arrow in *Corvus corax* indicates the mobile joint between pterygoid and palatine. (B) 3D models of the vomer of *Dinornis robustus*, *Anas crecca* and *Strepera graculina* in lateral view (left) and anterior view (right), not at scale (3D models from Hu et al., 2019). Abbreviations: Max, Maxillary; Pal, Palatine; Premax, Premaxillary; Pter, Pterygoid; Vom, Vomer.



*Anseranas semipalmata*, and *Cairina moschata*) and Inopinaves (e.g., *Aquila audax*, *Falco cenchroides*, and *Haliastur sphenurus*) possess a fused vomer that is completely mediolaterally flattened in transection and vertically orientated within the pterygoid-palatine complex (Fig. 1B). Therefore, we created a second dataset (Dataset B), where species with this latter, flat vomer morphology were excluded. Furthermore, the palaeognath birds *Struthio camelus* and *Dromaieus novaehollandiae* of the original Dataset A were represented by both juvenile and adult specimens. Because ontogenetic variation could, however, potentially affect size and position of the palaeognath morphospace, we removed the juvenile and subadult specimens of *Struthio camelus* and *Dromaieus novaehollandiae* in order to reran the analysis just with adult semaphoronts (Dataset C). Finally, we created a fourth dataset, where both juvenile/subadult specimens and species with flat vomers were removed from the sample (Dataset D).

For superposition of the 3D landmark data, we followed [Hu et al. \(2019\)](#) by performing a *Generalized Procrustes Analysis (GPA)*. The GPA was done with the help of the *gpagen* function in Geomorph. Afterward, we performed a *principal component analysis (PCA)* in order to visualize the shape variability of the vomer and the variance of morphospace for two groupings: (1) Paleognathae versus Neognathae and (2) Paleognathae, Inopinaves, Galloanserae, Gruiformes and Aequirornithes. This was done with the *plotTangentSpace* function from Geomorph.

Because the vomer showed great variation in centroid size after superimposition, ranging from 14.60 (*Manorina melanocephala*) to 168.32 (*Dromaieus novehollandia*), we tested if there is a significant correlation between Procrustes coordinates and log-transformed centroid size ([Goodall, 1991](#)) using the function *procD.lm* in Geomorph. This function performs a multivariate regression between the shape and size with a permutation of 10,000 iterations. A significant relationship between both parameters indicates that the superimposed shape still contains an allometric signal. Based on this correlation we estimated non-allometric residuals of the Procrustes coordinates and repeated the PCA. In addition, we tested each of the first eleven PCs that together describe more than 95 of total variation for allometric signals.

A set of 1,000 relaxed-clock molecular trees, which follow the topology of [Hackett et al. \(2008\)](#) and summarize the range of uncertainties in terms of time calibration of ancestral nodes, were downloaded from birdtree (birdtree.org) ([Jetz et al., 2012, 2014](#)) including all extant bird species in the dataset ([Supplementary Data S1](#)). Due to uncertainties in the taxonomic identification of *Aquila* sp., this specimen was removed from the sample as we could not include it in the phylogeny. Because the specimen occupies almost the same position as *Aquilla audax*, we consider this deletion to have a negligible effect on the outcome of the analyses. Furthermore, the species *Sterna bergii* and *Grus rubicunda* used in the analysis from [Hu et al. \(2019\)](#) are junior synonyms of *Thalasseus bergii* ([Bridge et al., 2005](#)) and *Antigone rubicunda* ([Krajewski et al., 2010](#)). Using the function *consensus.edges* in the R package phytools v.0.7-20, we computed a temporal consensus. The extinct dinornithiform species were placed as sister-group to Tinamidae following [Mitchell et al. \(2014\)](#). Because of their recent extinction ([Holdaway and Jacomb, 2000; Turvey and Holdaway, 2005](#)), the age was set to zero, similar to the other crown birds. The stem line representatives *Sinovenator changii* and *Sapeornis chaoyangensis* were added following the time-calibrated phylogeny of [Rauhut et al. \(2019\)](#). Because of the presence of juvenile specimens in datasets A and B, we added the juvenile specimens by splitting OTU (operational taxonomic unit) of *Struthio camelus* and *Dromaieus novehollandia* into a polytomy with each sub-OTU having a branch length of one year (this value had to be standardized, as *pFDA* requires an isometric tree). The impact of phylogeny on shape and centroid size (log-transformed) was tested using the function *physignal* in Geomorph. Based on *K*-statistics, this method evaluates the impact of phylogeny on a multivariate dataset relative to what is expected, if evolution is simulated under a Brownian motion model ([Blomberg et al., 2003](#)).

To explore the size of the single morphospaces of each taxon, we computed the morphological disparity using *morphol.disparity* in Geomorph. This analysis uses the Procrustes variance as disparity metric, which is the sum of all diagonal elements of a group covariance matrix divided by the number of ob-



servations within the group (Zelditch et al., 2012). Statistical comparisons of group sizes were executed with help of a permutation test with 999 iterations. To test for potential overlap in morphospace of vomer shapes in different clades of crown bird (see grouping 1 and 2) and their relation to the stem line representatives *Sinovenator changii* and *Sapeornis chaoyangensis*, we applied three different multivariate statistical methods, using the first eleven PCs as input data. We first applied a nonparametric multivariate analysis of variance (*perMANOVA*). This method evaluates the potential overlapping of groups in morphospace by testing the significance of their distribution on the basis of permutation (10,000 replications) and Euclidean distance (as one of several possible distance measures), not requiring normal distribution of the data (Anderson, 2001; Hammer and Harper, 2006). The spatial relationship of groups relative to each other is expressed by an  $F$  value and  $p$  value. For the five-group comparison, the  $p$  values were Bonferroni-corrected by multiplying the value with the number of comparisons. Next, we ran a discriminant analysis (*DA*), which reduces a multivariate data set to a smaller set of dimensions by maximizing the separation between two or more groups using Mahalanobis distances. This distance measure is estimated from the pooled within-group covariance matrix, resulting in a linear discriminant classifier and an estimated group assignment for each species. The results were cross-validated using Jackknife resampling (Hammer and Harper, 2006; Hammer, 2020). Both multivariate tests were done with the program PAST v.4.03 (Hammer et al., 2001). Finally, we performed a phylogenetic flexible discriminant analysis (*pFDA*) (Schmitz and Motani, 2011; Motani and Schmitz, 2011) in R. This method removes the phylogenetic bias from the categorical variables before the actual discriminant analysis is undertaken by estimating Pagel's lambda, which tests how the grouping correlates with phylogeny. This was done for all allometric and non-allometric datasets.

The error of correct identification from the resulting confusion matrices was compared between allometric and non-allometric data. For these comparisons, we used nonparametric *Mann-Whitney U* and *Kruskal-Wallis* tests, which both estimates, whether or not two univariate samples were taken from populations with equal medians, being more robust against small sample sizes and data without normal distribution than parametric tests (Hammer and Harper, 2006). Both tests were carried out with PAST.

Finally, we applied an ordinary least square regression analysis to 19 species, testing the correlation between log-transformed vomer size and the skull size using a log-transformed box volume (Height x Width x Length). The measurements of the skull box volume were taken from skullsite (skullsite.com).

## Results

Based on the *PCA* of the original dataset, the first two PCs explain over 52% (Fig. 2A) of total shape variation (PC1: 27.5%; PC2: 25.1%). The morphospace of Palaeognathae and Neognathae is almost equal in size. Taking the small sample size of Palaeognathae into account, the size of their morphospace indicates relatively great shape variation. This is supported by the Procrustes variances, which indicates a larger shape disparity in Palaeognathae. Both Palaeognathae and Neognathae show a strong overlap along PC1 and a partial overlap along PC2. When comparing neognath subclades, Aequorlornithes show strong overlap along both PCs with the palaeognath morphospace. Gruiformes lie in the overlapping area of both groups. The morphospace of Inopinaves and Galloanserae overlap with each other on both axes, but are separated from Palaeognathae, Aequorlornithes and Gruiformes along PC2. Within Neognathae, Galloanserae have the largest shape disparity, becoming successively smaller in Inopinaves, Aequorlornithes and Gruiformes (Supplementary Data S2; S3; Fig. S1; S4; Table S1).

Allometry summarizes about 6.4% of total shape variation. Using non-allometric residuals PC1 explains 29.3% and PC2 22.9% (Fig. 2B). While the general distribution of the single bird clades does not change along PC1, the groups are less separated along PC2, which contains the major allometric signal

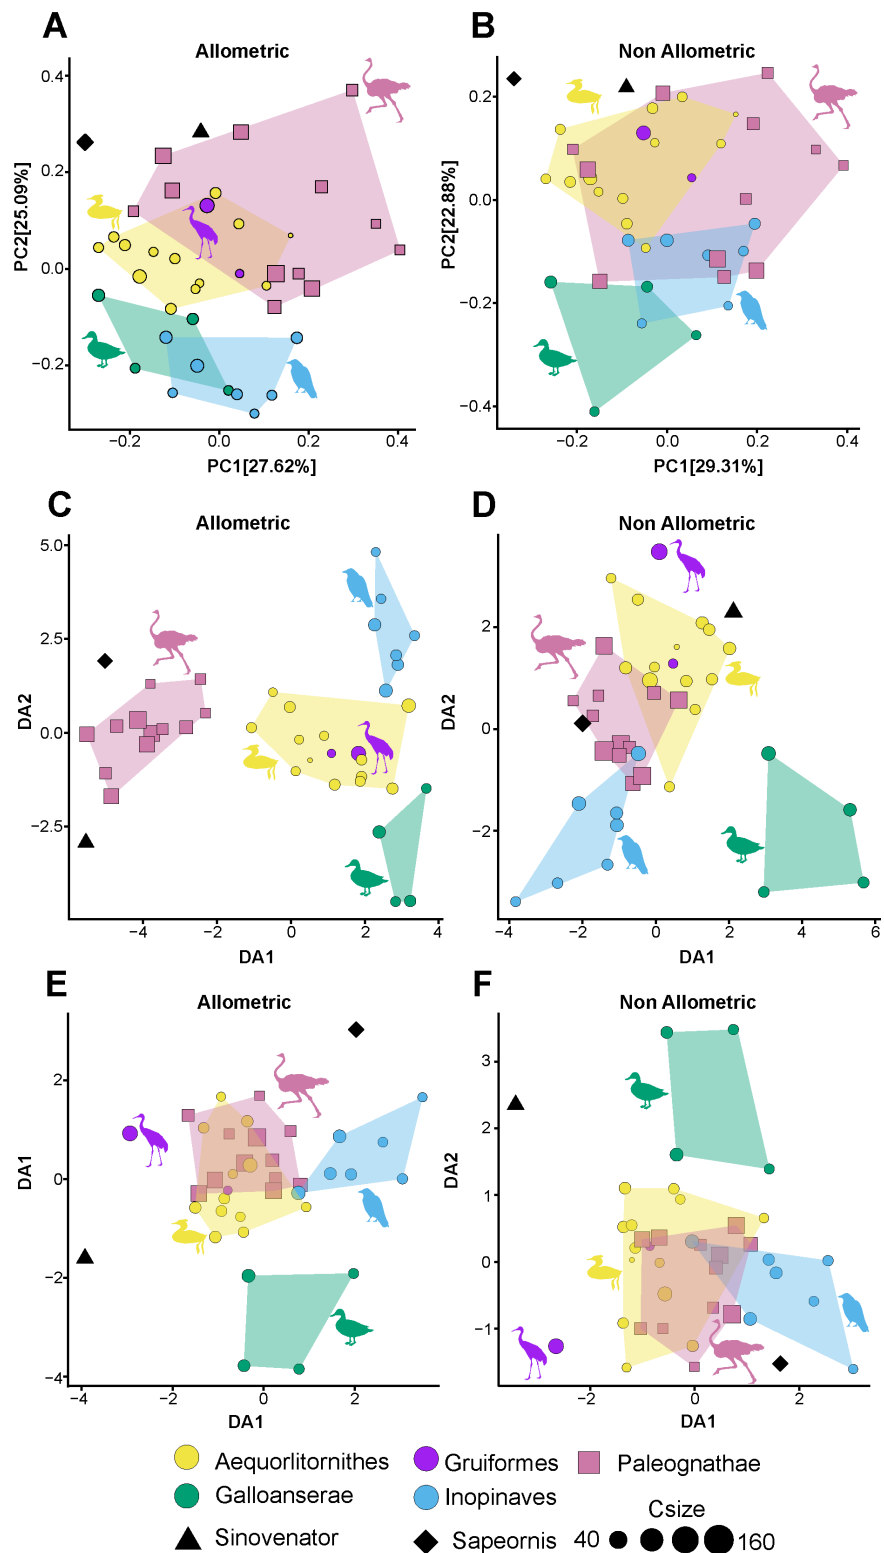

**Figure 2. Differences between allometric and non-allometric morphospaces of the vomer (Dataset A) in palaeognath and neognath birds.** (A) PCA (Principal Component Analysis) results of allometric data. (B) PCA results of non-allometric data. (C) DA (Discriminant Analysis) results of allometric data. (D) DA results of non-allometric data. (E) pFDA (phylogenetic Flexible Discriminant Analysis) results of allometric data. (F) pFDA results of non-allometric data. Centroid sizes (Csize) are indicated by the size of the symbols. All silhouettes are taken from [www.phylopic.org/](http://www.phylopic.org/).



within the principal components (slope: -0.523;  $R^2$ : 0.185;  $p$ : 0.005; predicted variation: 19.5%), which is 4.9% of total shape variation in the original dataset. Here, the palaeognath morphospace overlaps fully with Aequorlornithes and Gruiformes, partly with Inopinaves and marginally with Galloanserae. For the three other datasets, we observe more or less similar general trends before and after size correction, although the single morphospaces are partly shrunk. In all cases, the two stem line representatives *Sinovenator changii* and *Sapeornis chaoyangensis* lie within the marginal area of the palaeognaths/aequorlornithines morphospace. Here, vomer morphology of the troodontid *Sinovenator changii* is more bird-like than that of the avialian *Sapeornis chaoyangensis*. The exclusion of the allometric shape variation has only a minor impact on disparity. Thus, all disparity trends found in the original dataset persist in the non-allometric datasets ([Supplementary Data S2; S3: Fig. S1; S4: Table S1](#)).

As previously detected by [Hu et al. \(2019\)](#), vomer shape is impacted by phylogeny. Neither the modification of the sampling nor the exclusion of allometry changes this relationship. In contrast, log centroid size does not contain a phylogenetic signal ([Supplementary Data S4: Table S2](#)).

In all studied datasets, the *perMANOVA* found a significant separation between palaeognath and neognath birds, showing no impact of allometry. For the five-group comparison of the original dataset (A), the overall results still indicate significant separation between clades for both allometric and non-allometric data. However, group-by-group comparison of allometric data indicates an overlap in morphospace of Gruiformes with Aequorlornithes, Inopinaves, Galloanserae and Palaeognathae. These overlaps of Gruiformes with other bird clades persist when allometry is removed from shape, but in addition, Aequorlornithes cannot be distinguished from Palaeognathae anymore, as indicated by the *PCA* results ([Fig. 2A, B](#)). The overlap between clades increases with the exclusion of species with flat vomers and non-adult semaphoronts ([Supplementary Data S4: Tables S3, S4](#)).

For the original dataset (A) with allometry included, the *DA* identifies all species correctly as Palaeognathae or Neognathae. The error of false identification increases to 2.6% if the data are jackknifed. When allometry is removed, the error increases to 13.2% before and 36.8% after jackknife resampling. In the former case, the misidentifications are restricted to neognath birds, which are wrongly classified as Palaeognathae, while jackknifing leads to identification errors in both groups. For the five-group comparison, all species of dataset (A) are correctly identified, when allometry is still present. The error is 18.4% after jackknife resampling, showing minor mismatches in all clades. Excluding allometry, the error increases to 10.5% before and 47.4% after jackknifing. While in the former case, a few Aequorlornithes (2) and Inopinaves (1) species are wrongly identified as Palaeognathae ([Fig. 2C, D](#)), Palaeognathae cannot be separated from the neognath subclades anymore after resampling. The exclusion of species with flat vomers and non-adult semaphoronts leads to an increase of error ([Supplementary Data S4: Tables S3–S6](#)).

The *pFDA* found 15.8% of incorrect identifications when Palaeognathae are compared with neognaths in the original dataset (A). This error increases to 31.6% if shape is corrected for allometry. In both cases, error is primarily based on the incorrect identification of palaeognath specimens as neognaths. When Palaeognathae are compared with neognath subclades, the error of correct identification is 10.5% before and 26.3% after allometry is removed from the data. For the allometric data, the misidentifications result from the overlap between Palaeognathae, Aequorlornithes and Gruiformes. The misidentifications between these three groups are increased when shape is corrected for allometry, while Inopinaves are in part also wrongly identified as Palaeognathae. The exclusion of species with a flat vomer and/or non-adult semaphoronts usually causes a decrease of false identifications. However, the non-allometric dataset shows an increase in error for the two-group comparison, when species with flat vomers are excluded, and for the five-group comparison, when only adult semaphoronts are taken into account ([Fig. 2E, F](#)). Nevertheless, for all four datasets, the error of correct identification is significantly higher for non-allometric vomer shapes ([Fig. 3A; Supplementary Data S4: Tables S3–S6](#)).

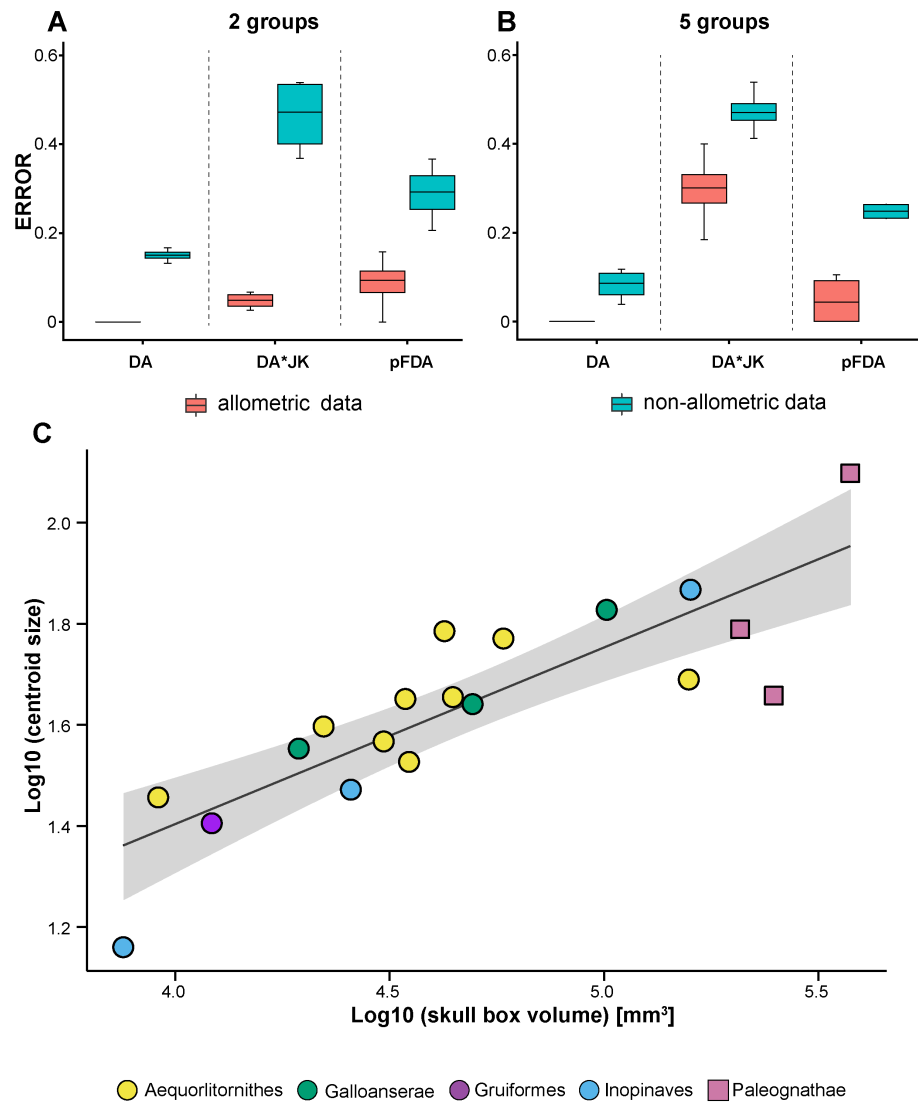

**Figure 3. Errors of correct taxonomic identification for all comparisons of Datasets A-D.** Two-group identification (Palaeognathae and Neognathae) before (red) and after (green) correction for allometry. DA, *Discriminant analysis*; DA\*JK, *Discriminant Analysis with jackknife resampling*; pFDA, *phylogenetic Flexible Discriminant Analysis*. (B) Five-group identification (Palaeognathae, Aequorlornithes, Galloanserae, Gruiformes and Inopinaves). (C) OLS regression (black line) between log-transformed skull box volume and logtransformed centroid size of the vomer. Grey shadow marks the area of the 95% confidence interval.

## Discussion

The skull of crown birds possesses a complex kinetic system that includes a mobilized quadrate, the zygomatic arch (= jugal bar) and the pterygoid-palatine complex (PPC) that allows for the simultaneous, but restricted motion of both jaws (Bock, 1964; Zusi, 1984). According to Zusi (1984), the kinetic system can be differentiated into three main types: (1) prokinesis describes the rotation of the whole beak around the nasal-frontal hinge; (2) amphikinesis is derived from prokinesis, including the rotation of the beak around the nasalfontal hinge plus an additional flexion of the anterior portion of the beak; and (3) rynchokinesis, which in contrast includes a simple flexion of the beak around one or several bending zones rostral to the nasal-frontal suture, lacking a true hinge. Depending on the position of the bending zones, rynchokinesis can be further differentiated into five subtypes (Zusi, 1984). Most palaeognath birds pos-





sess central rhynchokinesis, while neognaths have realized all types of cranial kinesis (Zusi, 1984), including some taxa with akinetic skulls (Reid, 1835; Sims, 1955; Degrange et al., 2010). In the past, several authors (Hofer, 1954; Simonetta, 1960; Bock, 1963) suggested a close relationship between the morphology of the PPC and type of cranial kinesis. However, Gussekloo et al. (2001) demonstrated that all types of kinesis present in crown birds have similar movements of the quadrate, zygomatic arch and PPC. Palaeognathae and Neognathae only differ in the magnitude of kinetic movements in that Palaeognathae have slightly more restricted movement due to their rigid palate missing a movable joint between the pterygoid and palatine (Gussekloo and Bout, 2005).

Thus, although the results of geometric morphometric analysis of the vomer shape by Hu et al. (2019) imply at first glance a distinct separation between Palaeognathae and Neognathae, this separation does not necessarily reflect their conclusions regarding the evolution of cranial kinesis in crown birds, i.e., that cranial kinesis represents an innovation of Neognathae. As indicated by the PCA, Palaeognathae occupy an enormous vomeral morphospace (Hu et al., 2019), which mirrors their generally large palatal disparity (see McDowell, 1948) and partly overlaps with Gruiformes and Aequorlornithes. In all cases tested, however, the exclusion of allometric shape variation generally increases the error of misidentification between all groups (Fig. 3A; Supplementary Data S4: Table S7), indicating that the taxonomic distinctions of shape found by Hu et al. (2019) are at least partly an artefact of size. This primarily concerns PC2, which according to Hu et al. (2019) separates Palaeognathae from Neognathae, but also contains the major part of allometric information. According to shape variation explained by PC2, larger birds tend to evolve vomers that are more dorsoventrally compressed. Only members of the Galloanserae could still be identified with a high amount of certainty when allometry is excluded.

Thus, our finding supports previous studies that demonstrated a relevant impact of allometry on skull shape evolution in birds (Klingenberg and Marugán-Lobón, 2013; Bright et al., 2016; Linde-Medina, 2016; Tokita et al., 2017; Bright et al., 2019). By modifying the dataset, it becomes further clear that both the homoplastic presence of flat vomers in Aequorlornithes, Inopinaves, Galloanserae (Dataset B) and ontogenetic variation (Dataset C) affects the accuracy of taxonomic identification. In addition, Palaeognathae and Neognathae do not differ in vomer size when compared to the head size (Fig. 3B). Consequently, vomer shape is not practical for taxonomic identification and should not be used as a proxy to infer the presence or absence of cranial kinesis in crown birds or their stem. As the manifold shape diversity of crown bird's skulls is impaired by a tessellated evolution with multiple convergent events (e.g., Zusi, 1993; Felice and Goswami, 2018), the use of isolated elements for taxonomic identification and/or biomechanical implications should be treated generally with some caution.

In fact, DA and *pFDA* frequently identified the troodontid *Sinovenator changii* and avialan *Sapeornis chaoyangensis* as neognaths or neognath subclades when allometry is excluded, while the original dataset implied a referral to Palaeognathae (see also Hu et al., 2019). However, the skull anatomy of both species indicates no cranial kinesis (Xu et al., 2002; Wang et al., 2017; Yin et al., 2018; Hu et al., 2020).

The origin and evolution of cranial kinesis in the stem line of birds is still not well understood due to the rarity of complete three-dimensional skulls. However, skull material from the ornithurines *Ichthyornis dispar* and *Hesperornis regalis* indicates a certain degree of rhynchokinesis (Bühler et al., 1988; Field et al., 2018) that might be comparable to that of extant Palaeognathae or some Aequorlornithes, but further shows that this functional character was already present before the origin of the crown. Their kinesis is indicated by the loss of the jugal-postorbital bar and the ectopterygoid (resulting in a loss of contact in the jugal with the skull roof and the palate), the presence of a mobile bicondylar quadrate and a mobile joint between quadrate and quadratojugal. Recently, Plateau and Foth (2020) speculated that the peramorphic bone fusion in the braincase could be also related to cranial kinesis, in which the fusion-induced immobility constrains a controlled kinetic dorsoventral flexion of the avian beak during biting/picking. Based on these characters, most Mesozoic Avialae (including *Sapeornis chaoyangensis*) still



had akinetic skulls, although some Enantiornithes possessing a reduced jugal-postorbital bar might have evolved primitive kinesis convergently to Ornithurae (O'Connor and Chiappe, 2011).

In summary, allometry describes the relationship between size and shape, which is one of the key concepts in biology to explain variation of shape in organisms (Klingenberg, 1998), and is crucial for studying taxonomy, ontogeny and functional morphology. Investigating the effect of allometry on the vomer shape in crown birds with help of multiple multivariate statistical methods, indicates that this bone is not a good proxy for taxonomy. Shape differences between Palaeognathae and Neognathae are clearly affected by size and can neither be used to differentiate between different types of cranial kinesis nor to explain the evolution of cranial kinesis within crown birds. In contrast, the evolution of cranial kinesis in birds needs to be studied in context of the whole pterygoid-palatine complex and its contacts with the braincase and quadrate-zygomatic arch.

## Acknowledgements

We thank Walter Joyce, Roland Sookias and Sergio Martínez Nebreda for their critical comments on previous versions of the manuscript. The Swiss National Science Foundation is thanked for its financial support (PZ00P2\_174040 to C.F.).

### Additional information

#### Funding

This study was funded by the Swiss National Science Foundation (PZ00P2\_174040).

#### Competing interests

The authors declare they have no personal or financial conflict of interest relating to the content of this study.

#### Author contributions

O.P. and C.F. designed the research project and analysed the data; O.P. and C.F. wrote the paper and prepared all figures. All authors have seen and approved the manuscript.

#### Data availability

The 3D models and landmarks data of Hu et al. (2019) are available at Figshare (DOI: 10.6084/m9.figshare.7769279.v2).

The data relevant to the present study are provided below as [Supplementary information](#).

#### Supplementary information

All files are available online (doi: 10.1101/2020.07.02.184101).

1. Data S1: Phylogenetic trees used for *pFDA*.
2. Data S2: *PCA* results of all datasets before and after correction for allometry.



3. Data S3: PCA plots of Datasets B-D before and after correction for allometry.
4. Data S4: Results of *npMANOVA*, *DA* and *pFDA*.
5. Data S5: R Code including all statistical analyses.

## References

- Adams DC and Otárola-Castillo E (2013). geomorph: an R package for the collection and analysis of geometric morphometric shape data. *Methods in Ecology and Evolution* 4, 393–399. doi: 10.1111/2041-210X.12035.
- Anderson MJ (2001). A new method for non-parametric multivariate analysis of variance. *Austral Ecology* 26, 32–46. doi: 10.1111/j.1442-9993.2001.01070.pp.x.
- Bellairs A and Jenkin C (1960). The Skeleton of Birds. In: *Biology and Comparative Physiology of Birds*. Vol. 1. New York: Academic Press, pp. 241–300. isbn: 978-1-4832-3142-6.
- Blomberg SP, Garland T, and Ives AR (2003). Testing for phylogenetic signal in comparative data: behavioral traits are more labile. *Evolution* 57, 717–745. doi: 10.1111/j.0014-3820.2003.tb00285.x.
- Bock WJ (1963). The cranial evidence for ratite affinities. In: *Proceedings of the 13th International Ornithological Congress*. Vol. 1, pp. 39–54.
- Bock WJ (1964). Kinetics of the avian skull. *Journal of Morphology* 114, 1–41. doi: 10.1002/jmor.1051140102.
- Bridge ES, Jones AW, and Baker AJ (2005). A phylogenetic framework for the terns (Sternini) inferred from mtDNA sequences: implications for taxonomy and plumage evolution. *Molecular Phylogenetics and Evolution* 35, 459–469. doi: 10.1016/j.ympev.2004.12.010.
- Bright JA, Marugán-Lobón J, Cobb SN, and Rayfield EJ (2016). The shapes of bird beaks are highly controlled by nondietary factors. *Proceedings of the National Academy of Sciences* 113, 5352–5357. doi: 10.1073/pnas.1602683113.
- Bright JA, Marugán-Lobón J, Rayfield EJ, and Cobb SN (2019). The multifactorial nature of beak and skull shape evolution in parrots and cockatoos (Psittaciformes). *BMC Evolutionary Biology* 19, 104. doi: 10.1186/s12862-019-1432-1.
- Bühler P, Martin LD, and Witmer LM (1988). Cranial kinesis in the Late Cretaceous birds *Hesperornis* and *Parahesperornis*. *The Auk* 105, 111–122. doi: 10.1093/auk/105.1.111.
- Degrange FJ, Tambussi CP, Moreno K, Witmer LM, and Wroe S (2010). Mechanical analysis of feeding behavior in the extinct “terror bird” *Andalgalornis steulleti* (Gruiformes: Phorusrhacidae). *PLoS ONE* 5, e11856. doi: 10.1371/journal.pone.0011856.
- Felice RN and Goswami A (2018). Developmental origins of mosaic evolution in the avian cranium. *Proceedings of the National Academy of Sciences* 115, 555–560. doi: 10.1073/pnas.1716437115.
- Field DJ, Hanson M, Burnham D, Wilson LE, Super K, Ehret D, Ebersole JA, and Bhullar BAS (2018). Complete *Ichthyornis* skull illuminates mosaic assembly of the avian head. *Nature* 557, 96–100. doi: 10.1038/s41586-018-0053-y.
- Goodall C (1991). Procrustes methods in the statistical analysis of shape. *Journal of the Royal Statistical Society: Series B (Methodological)* 53, 285–321. doi: 10.1111/j.2517-6161.1991.tb01825.x.
- Gusseklou SWS and Bout RG (2005). The kinematics of feeding and drinking in palaeognathous birds in relation to cranial morphology. *Journal of Experimental Biology* 208, 3395–3407. doi: 10.1242/jeb.01769.



- Gussekkloo SWS, Vosselman MG, and Bout RG (2001). Three-dimensional kinematics of skeletal elements in avian prokinetic and rhynchokinetic skulls determined by Roentgen stereophotogrammetry. *Journal of Experimental Biology* 204, 1735–1744.
- Hackett SJ, Kimball RT, Reddy S, Bowie RCK, Braun EL, Braun MJ, Chojnowski JL, Cox WA, Han KL, Harshman J, Huddleston CJ, Marks BD, Miglia KJ, Moore WS, Sheldon FH, Steadman DW, Witt CC, and Yuri T (2008). A phylogenomic study of birds reveals their evolutionary history. *Science* 320, 1763–1768. doi: 10.1126/science.1157704.
- Hammer Ø (2020). *PAST Paleontological Statistics v.4.03. Reference Manual*. Oslo: University of Oslo.
- Hammer Ø and Harper DAT, eds. (2006). *Paleontological Data Analysis*. Malden, MA, USA: Blackwell Publishing. isbn: 978-0-470-75071-1. doi: 10.1002/9780470750711.
- Hammer Ø, Harper DAT, and Ryan PD (2001). PAST: Paleontological statistics software package for education and data analysis. *Palaeontologia Electronica* 4, 1–9.
- Hofer H (1954). Neuere Untersuchungen zur Kopfmorphologie der Vögel. In: *Acta XI Congressus Internationalis Ornithologici*, pp. 104–137.
- Holdaway RN and Jacomb C (2000). Rapid extinction of the moas (Aves: Dinornithiformes): model, test, and implications. *Science* 287, 2250–2254. doi: 10.1126/science.287.5461.2250.
- Hu H, O'Connor JK, McDonald PG, and Wroe S (2020). Cranial osteology of the Early Cretaceous *Sapeornis chaoyangensis* (Aves: Pygostylia). *Cretaceous Research* 113, 104496. doi: 10.1016/j.cretres.2020.104496.
- Hu H, Sansalone G, Wroe S, McDonald PG, O'Connor JK, Li Z, Xu X, and Zhou Z (2019). Evolution of the vomer and its implications for cranial kinesis in Paraves. *Proceedings of the National Academy of Sciences* 116, 19571–19578. doi: 10.1073/pnas.1907754116.
- Huxley TH (1867). On the classification of birds; and on the taxonomic value of the modifications of certain cranial bones observable in the class. *Proceedings of the Zoological Society of London* 27, 415–472.
- Jetz W, Thomas GH, Joy JB, Hartmann K, and Mooers AO (2012). The global diversity of birds in space and time. *Nature* 491, 444–448. doi: 10.1038/nature11631.
- Jetz W, Thomas GH, Joy JB, Redding DW, Hartmann K, and Mooers AO (2014). Global distribution and conservation of evolutionary distinctness in birds. *Current Biology* 24, 919–930. doi: 10.1016/j.cub.2014.03.011.
- Klingenberg CP (1998). Heterochrony and allometry: the analysis of evolutionary change in ontogeny. *Biological Reviews* 73, 79–123. doi: 10.1111/j.1469-185X.1997.tb00026.x.
- Klingenberg CP and Marugán-Lobón J (2013). Evolutionary covariation in geometric morphometric data: analyzing integration, modularity, and allometry in a phylogenetic context. *Systematic Biology* 62, 591–610. doi: 10.1093/sysbio/syt025.
- Krajewski C, Sipiorski JT, and Anderson FE (2010). Complete mitochondrial genome sequences and the phylogeny of cranes (Gruiformes: Gruidae). *The Auk* 127, 440–452. doi: 10.1525/auk.2009.09045.
- Linde-Medina M (2016). Testing the cranial evolutionary allometric ‘rule’ in Galliformes. *Journal of Evolutionary Biology* 29, 1873–1878. doi: 10.1111/jeb.12918.
- Mayr G (2017). *Avian Evolution*. Chichester, UK: John Wiley & Sons. isbn: 978-1-119-02067-7.
- McDowell S (1948). The bony palate of birds. Part I. The Palaeognathae. *The Auk* 65, 520–549. doi: 10.2307/4080603.
- Mitchell KJ, Llamas B, Soubrier J, Rawlence NJ, Worthy TH, Wood J, Lee MSY, and Cooper A (2014). Ancient DNA reveals elephant birds and kiwi are sister taxa and clarifies ratite bird evolution. *Science* 344, 898–900. doi: 10.1126/science.1251981.
- Motani R and Schmitz L (2011). Phylogenetic versus functional signals in the evolution of formfunction relationships in terrestrial vision. *Evolution* 65, 2245–2257. doi: 10.1111/j.1558-5646.2011.01271.x.



- O'Connor JK and Chiappe LM (2011). A revision of enantiornithine (Aves: Ornithothoraces) skull morphology. *Journal of Systematic Palaeontology* 9, 135–157. doi: 10.1080/14772019.2010.526639.
- Plateau O and Foth C (2020). Birds have peramorphic skulls, too: anatomical network analyses reveal oppositional heterochronies in avian skull evolution. *Communications Biology* 3, 195. doi: 10.1038/s42003-020-0914-4.
- R Core Team (2011). *R: a language and environment for statistical computing*. url: <http://www.r-project.org>.
- Rauhut OW, Tischlinger H, and Foth C (2019). A non-archaeopterygid avialan theropod from the Late Jurassic of southern Germany. *eLife* 8, e43789. doi: 10.7554/eLife.43789.
- Reid J (1835). Anatomical description of the Patagonian penguin. *Proceedings of the Zoological Society of London* 3, 132–148.
- Schmitz L and Motani R (2011). Nocturnality in dinosaurs inferred from scleral ring and orbit morphology. *Science* 332, 705–708. doi: 10.1126/science.1200043.
- Simonetta AM (1960). On the mechanical implications of the avian skull and their bearing on the evolution and classification of birds. *The Quarterly Review of Biology* 35, 206–220. doi: 10.1086/403106.
- Sims S (1955). The morphology of the head of the hawfinch (*Coccothraustes coccothraustes*). *Bulletin of the British Museum* 2, 371–393.
- Tokita M, Yano W, James HF, and Abzhanov A (2017). Cranial shape evolution in adaptive radiations of birds: comparative morphometrics of Darwin's finches and Hawaiian honeycreepers. *Philosophical Transactions of the Royal Society B* 372, 20150481. doi: 10.1098/rstb.2015.0481.
- Turvey ST and Holdaway RN (2005). Postnatal ontogeny, population structure, and extinction of the giant moa *Dinornis*. *Journal of Morphology* 265, 70–86. doi: 10.1002/jmor.10341.
- Wang Y, Hu H, O'Connor JK, Wang M, Xu X, Zhou Z, Wang X, and Zheng X (2017). A previously undescribed specimen reveals new information on the dentition of *Sapeornis chaoyangensis*. *Cretaceous Research* 74, 1–10. doi: 10.1016/j.cretres.2016.12.012.
- Xu X, Norell MA, Wang XL, Makovicky PJ, and Wu XC (2002). A basal troodontid from the Early Cretaceous of China. *Nature* 415, 780–784. doi: 10.1038/415780a.
- Yin YL, Pei R, and Zhou CF (2018). Cranial morphology of *Sinovenator changii* (Theropoda: Troodontidae) on the new material from the Yixian Formation of western Liaoning, China. *PeerJ* 6, e4977. doi: 10.7717/peerj.4977.
- Zelditch ML, Swiderski DL, and Sheets HD (2012). *Geometric Morphometrics for Biologists*. Amsterdam: Academic Press. isbn: 978-0-12-386903-6.
- Zusi RL (1984). A functional and evolutionary analysis of rhynchokinesis in birds. *Smithsonian Contributions to Zoology*, 1–40. doi: 10.5479/si.00810282.395.
- Zusi RL (1993). Patterns of diversity in the avian skull. In: *The skull. Vol. 2. Patterns of structural and systematic diversity*. Ed. by Hanken J and Hall BK. Chicago: University of Chicago Press, pp. 391–437.
